# Supplementary material for: Experimental and theoretical investigations of four amine derivatives as effective corrosion inhibitors for mild steel in HCl medium
Source: Royal Society of Chemistry journal article supplement (doi:10.1039/d0ra03560b), 2020-01-01
Supplement: d0ra03560b1.pdf [file d0ra03560b1.pdf]

## **Experimental and theoretical investigations of four amine derivatives as effective corrosion inhibitors for mild steel in HCl medium**

Yasmine Boughoues,<sup>1</sup> Messaoud Benamira,<sup>1,2\*</sup> Lyamine Messaadia,<sup>3</sup> Nafila Bouider,<sup>2</sup> Samia Abdelaziz<sup>1</sup>

<sup>1</sup>Laboratory of Interaction Materials and Environment (LIME), University of Mohamed Seddik Benyahia, Jijel, 18000, Algeria

<sup>2</sup>Department of Chemistry, University of Mohamed Seddik Benyahia, Jijel, 18000, Algeria

<sup>3</sup>Laboratoire Énergétique Appliquée et Matériaux, Université de Jijel, 18000, Algeria.

\*Corresponding author: [m\\_benamira@univ-jijel.dz](mailto:m_benamira@univ-jijel.dz); [benamira18@yahoo.fr](mailto:benamira18@yahoo.fr)

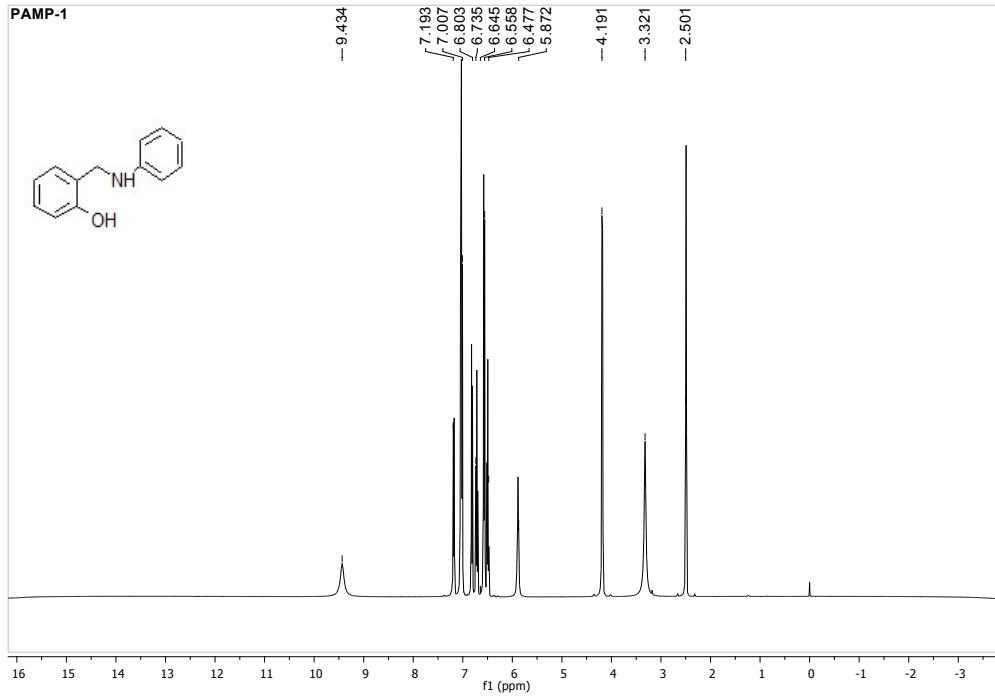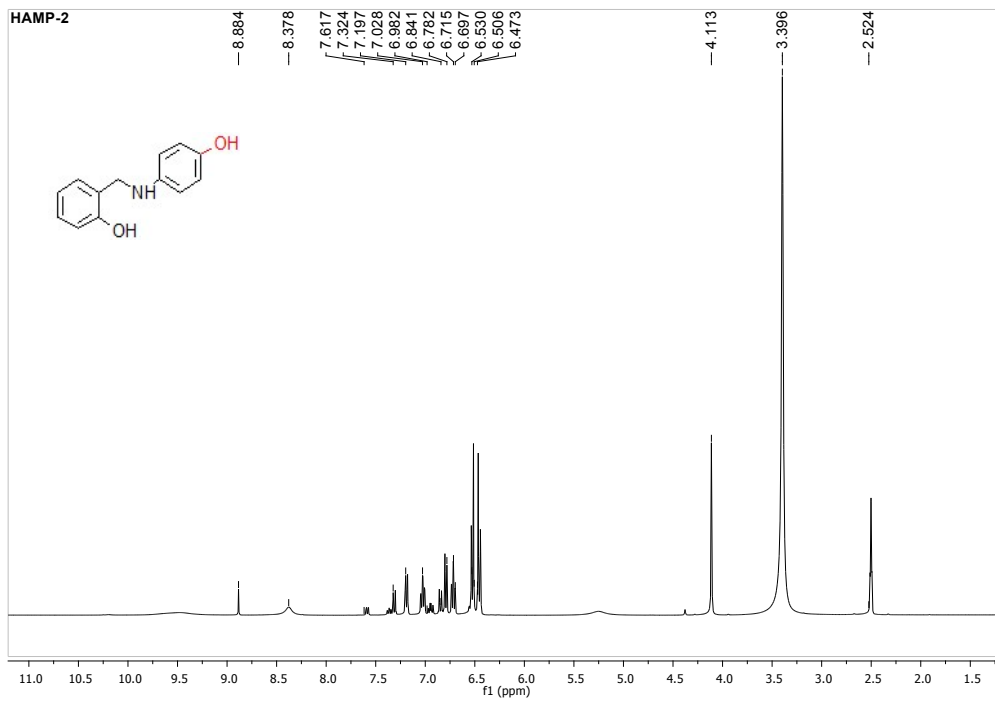

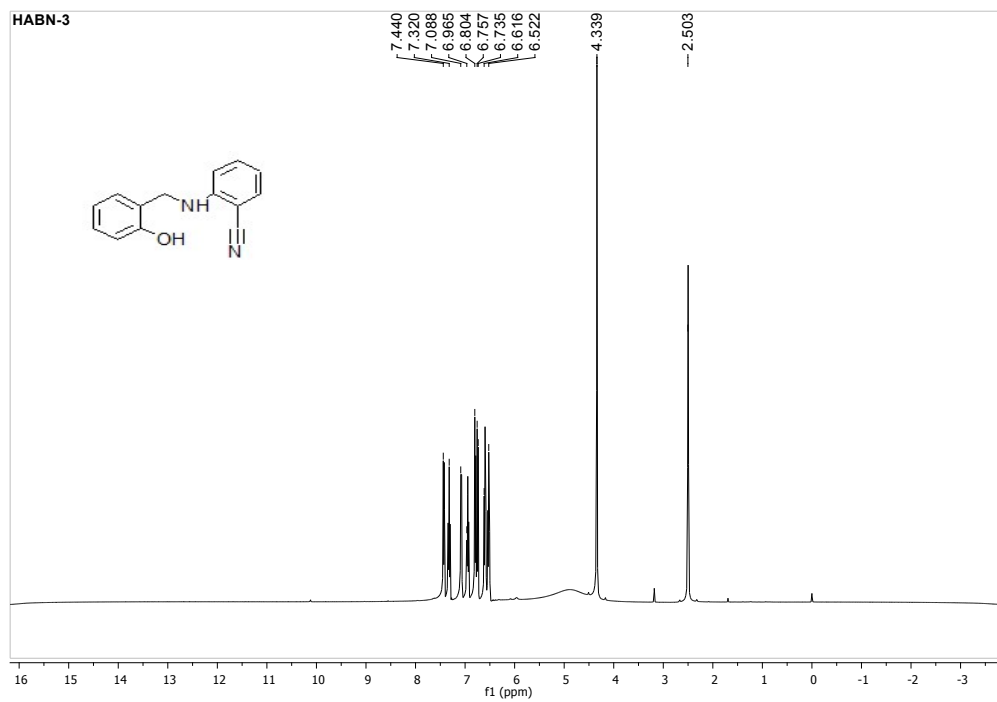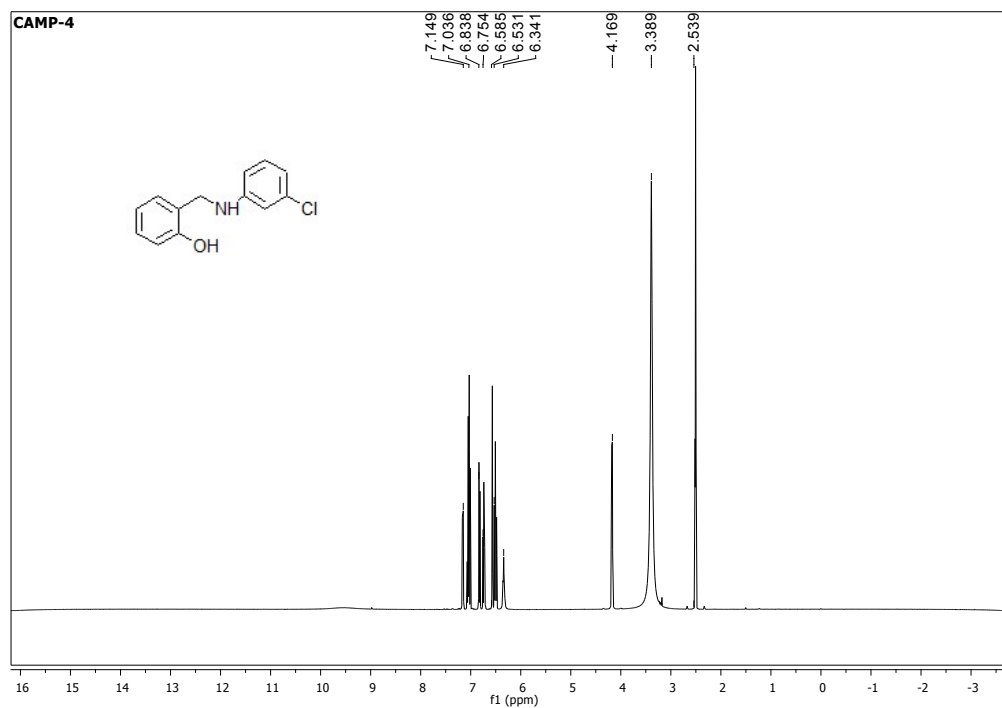

**Fig. S1**  $^1\text{H}$  NMR spectra

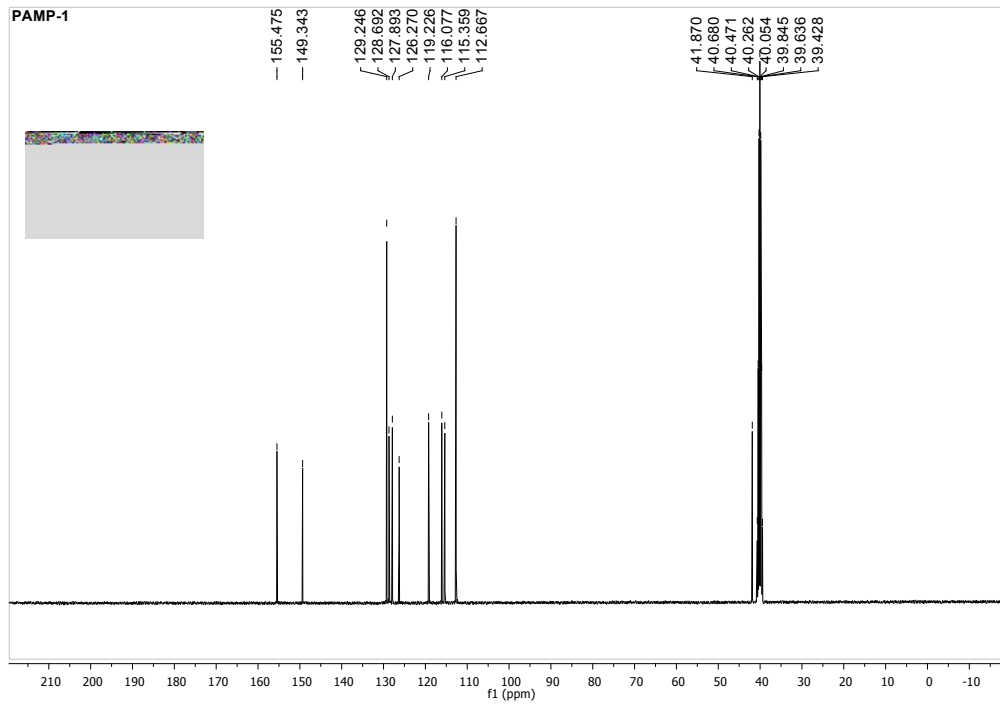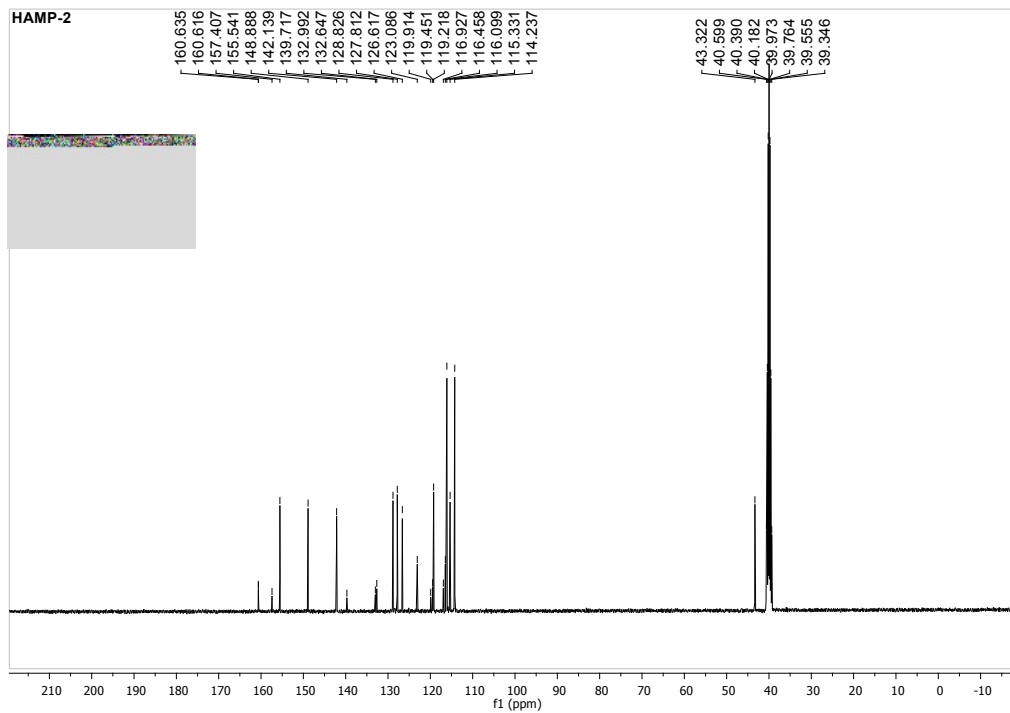

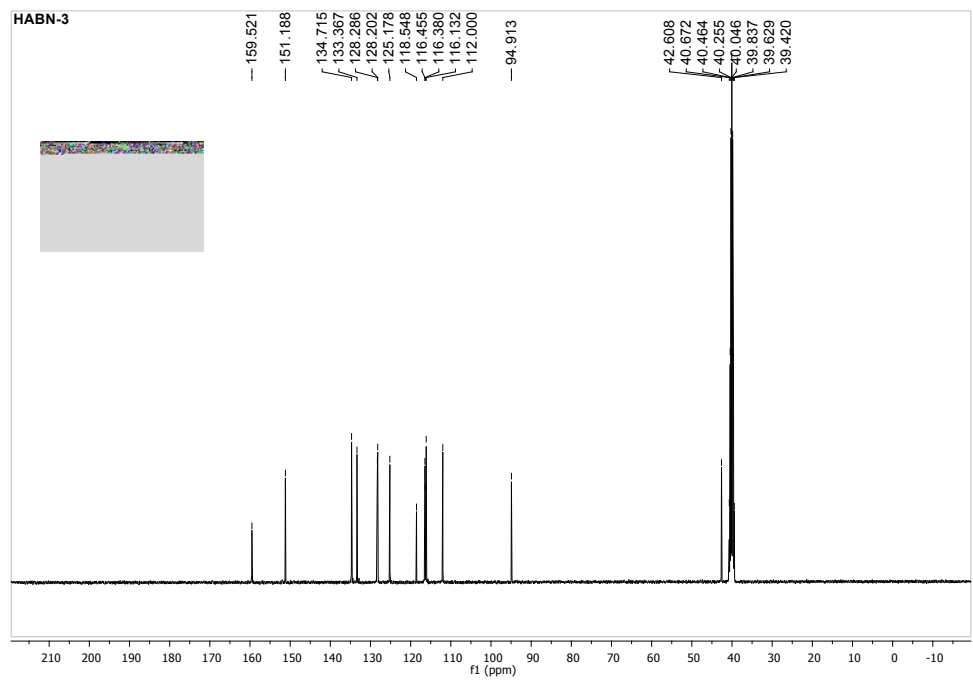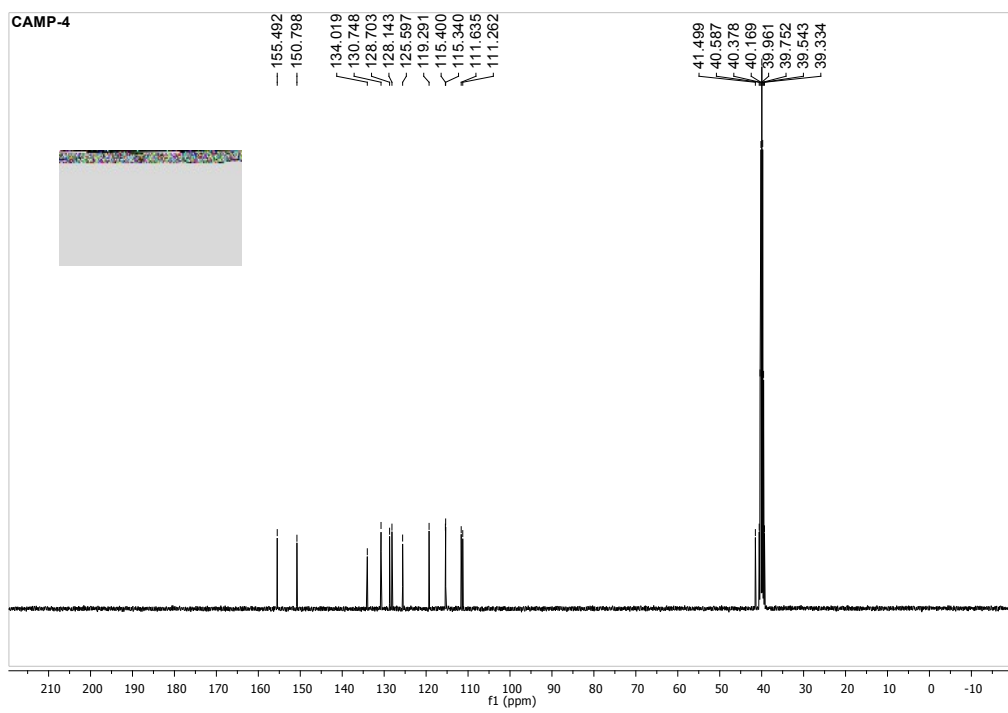

**Fig. S2**  $^{13}\text{C}$  NMR spectra
